# Supplementary material for: Association of the miR-17-5p variants with susceptibility to cervical cancer in a Chinese population
Source: PubMed Central journal article supplement (PMC5363537; doi:10.18632/oncotarget.12299), 2016-09-28
Supplement: oncotarget-07-76647-s001.pdf [file oncotarget-07-76647-s001.pdf]

## Association of the miR-17-5p variants with susceptibility to cervical cancer in a Chinese population

### Supplementary Materials

**Supplementary Table S1: Primers used for this study**

| SNP        | 1st-PCR                        | 2st-PCR                        | UEP_SEQ                    |
|------------|--------------------------------|--------------------------------|----------------------------|
| rs1048512  | ACGTTGGATGTCCTTGCCTATATCCATTAG | ACGTTGGATGCAAGCCTTTAAAGAAGGAGC | gTTAAAGAAGGAGCTGTTCTGG     |
| rs6659346  | ACGTTGGATGTTAGCTGTTGTTGGGGC    | ACGTTGGATGTCTGGTAGGTTTTCCAGATA | ACAGGTTTGGAAATCTTAATATC    |
| rs11006369 | ACGTTGGATGACGATCAGGAGTGTTCAGC  | ACGTTGGATGTGTTTTCGTTCTGCTGCAGG | gtGATGAAATCTGGATCCTTAATAAC |
| rs2862833  | ACGTTGGATGTGGTAGGGGCTTGCTTTTTG | ACGTTGGATGTACCTTCTAAGGGATCCAAG | AGGGATCCAAGAAGCAT          |
| rs3741216  | ACGTTGGATGTCTCCACAACCTCAACCAGT | ACGTTGGATGAGAGATTCAAAGCCTCCACG | CCGTCCCTTCTGAATTT          |
| rs217727   | ACGTTGGATGACCGGCGACTCCATCTTCA  | ACGTTGGATGTCAGCTCTGGGATGATGTGG | gGGCTGGTGGTCAACCGTCC       |
| rs2839702  | ACGTTGGATGCTGTCCGATGGTGTCTTTG  | ACGTTGGATGCACGTGTCGCTATCTTAGG  | GTGTCGCTATCTTAGGTGAAGC     |
| rs2067051  | ACGTTGGATGCTCCTTGCTGCGCAATGTC  | ACGTTGGATGGGAAGACAGGCAGTGCTCG  | aAGTGCTCGGGGAGTTGCAGCAGGAC |
| rs2274062  | ACGTTGGATGTCAAGTACTGAGATGGGTG  | ACGTTGGATGACACATTTAAGACCCATTC  | ccGAGCCATTCTTTTACCACAT     |
| rs9318375  | ACGTTGGATGATTCTGACCTCGTCAGTCC  | ACGTTGGATGCTATCCTAATTCTTGTCGCG | TCTCCTGCTGATAIGTTTGCC      |
| rs2732044  | ACGTTGGATGTTTCTCAGTTCAGCACTAC  | ACGTTGGATGCATATAGAACAGTACCCTCC | aACAACAACACAAAACAAAATGA    |
| rs1030389  | ACGTTGGATGAATTCATTAGGCTTCCCG   | ACGTTGGATGTTTTGCCGAAAGGCATCCTC | ATCCACACTGTAGCCAA          |
| rs1045935  | ACGTTGGATGGAGTACCAACTGTGTTCAAC | ACGTTGGATGGTGGTTTTATTGACCGTATC | TGGTTTTATTGACCGTATCATAACA  |
| rs12902710 | ACGTTGGATGAGTTTAGTGACGTGGAGCAG | ACGTTGGATGGTCTACAATTACCGTTACCG | CCGTTTTTAATAACCACTCAGG     |
| rs9931702  | ACGTTGGATGGTATGTAATGAGCAGTCTCC | ACGTTGGATGCTGACTCAGAAAGTAAGTGG | GCTAACTCATTGTTTCTTTCTAAAAT |
| rs9302648  | ACGTTGGATGACAGCACATTCTCTGGTGAC | ACGTTGGATGGCCAGCTGAAAAGAAGAGTC | ggAGAAGAGTCCTGACATG        |
